# Supplementary material for: A pyridine based meta-linking deep-blue emitter with high conjugation extent and electroluminescence efficiencies
Source: Royal Society of Chemistry journal article supplement (doi:10.1039/c6tc01689h), 2016-01-01
Supplement: c6tc01689h1.pdf [file c6tc01689h1.pdf]

# Electronic Supplementary Information

## Pyridine based *meta*-linking deep-blue emitter with high conjugation extent and electroluminescent efficiencies

Ze-Lin Zhu,<sup>ab</sup> Wen-Cheng Chen,<sup>b</sup> Liang-Dong Zhang,<sup>a</sup> Xiao-Le Liu,<sup>a</sup> Qing-Xiao Tong,<sup>a\*</sup> Fu-Lung Wong,<sup>b</sup> Feng Lu<sup>a</sup> and Chun-Sing Lee<sup>b\*</sup>

*Department of Chemistry, Shantou University, Guangdong 515063, China*

*E-mail: qxtong@stu.edu.cn*

*Center of Super-Diamond and Advanced Films (COSDAF) & Department of Physics and Materials Science, City University of Hong Kong, Hong Kong SAR, China*

*E-mail: apcslee@cityu.edu.hk*

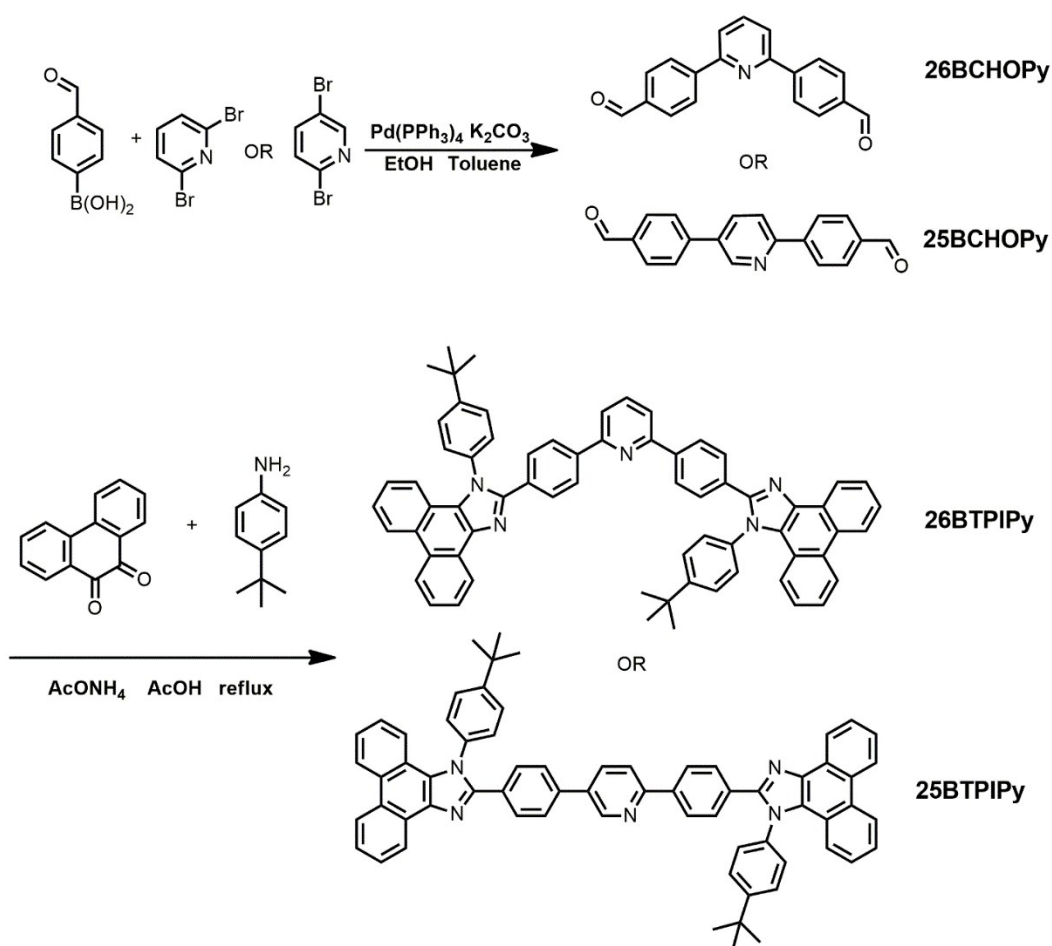

Scheme S1 Synthetic procedures of **26BTPIPy** and **25BTPIPy**.

## Synthetic procedures

The synthesis of 4,4'-(pyridine-2,6-diyl)dibenzal-dehyde (26BCHOPy) and 4,4'-(pyridine-2,5-diyl)dibenzaldehyde (25BCHOPy) was proceeded following reported procedures.<sup>1</sup>

**26BTPIPy**: 9,10-phenanthrenequinone (0.92 g, 4.4 mmol), 2,6-BCHOPy (0.57 g, 2 mmol), 4-*tert*-butylbenzenamine (0.66 g, 4.4 mmol), and ammonium acetate (2.31 g, 30.0 mmol) were added into glacial acetic acid (30 mL). The mixture was refluxed for 24 h under an argon atmosphere. After cooling to room temperature, an orange-yellow mixture was obtained and poured into methanol under stirring. The crude product was separated by filtration, washed with methanol, and dried under vacuum. The product was purified by column chromatography (silica gel) using eluent of petroleum ether/dichloromethane (V/V) 1/4 to give a pale solid, with a 70% yield (1.3 g). <sup>1</sup>H NMR (400 MHz, CD<sub>2</sub>Cl<sub>2</sub>) δ 8.86 (d, J = 7.9 Hz, 2H), 8.80 (d, J = 8.4 Hz, 2H), 8.75 (d, J = 8.4 Hz, 2H), 8.10 (d, J = 8.2 Hz, 4H), 7.86 (t, J = 7.7 Hz, 1H), 7.76 (t, J = 7.8 Hz, 8H), 7.69 (dd, J = 8.1, 6.2 Hz, 6H), 7.52 (dd, J = 8.3, 6.3 Hz, 6H), 7.30 (t, J = 7.6 Hz, 2H), 7.21 (d, J = 8.3 Hz, 2H), 1.47 (s, 18H). MS (ESI) *m/z*: [M + H]<sup>+</sup> calcd for C<sub>67</sub>H<sub>54</sub>N<sub>5</sub>: 929.17. Found: 929.0. Anal. Calcd for C<sub>67</sub>H<sub>53</sub>N<sub>5</sub>: C, 86.70; H, 5.76; N, 7.54; found: C, 86.78; H, 5.71; N, 7.49.

**25BTPIPy**: The synthetic procedures were similar to that of **26BTPIPy**. Yield: 55.5 %. <sup>1</sup>H NMR (300 MHz, CD<sub>2</sub>Cl<sub>2</sub>) δ 8.85 (d, J = 1.5 Hz, 1H), 8.81 (d, J = 8.2 Hz, 3H), 8.76 (d, J = 8.3 Hz, 2H), 7.81 – 7.74 (m, 4H), 7.73 – 7.64 (m, 10H), 7.58 (d, J = 2.3 Hz, 1H), 7.55 (t, J = 2.5 Hz, 1H), 7.52 (d, J = 2.2 Hz, 3H), 7.49 (d, J = 2.0 Hz, 2H), 7.37 – 7.25 (m, 8H), 1.47 (s, 18H). MS (ESI) *m/z*: [M + H]<sup>+</sup> calcd for C<sub>67</sub>H<sub>54</sub>N<sub>5</sub>: 929.17. Found: 928.9. Anal. Calcd for C<sub>67</sub>H<sub>53</sub>N<sub>5</sub>: C, 86.70; H, 5.76; N, 7.54; found: C, 86.75; H, 5.77; N, 7.46.

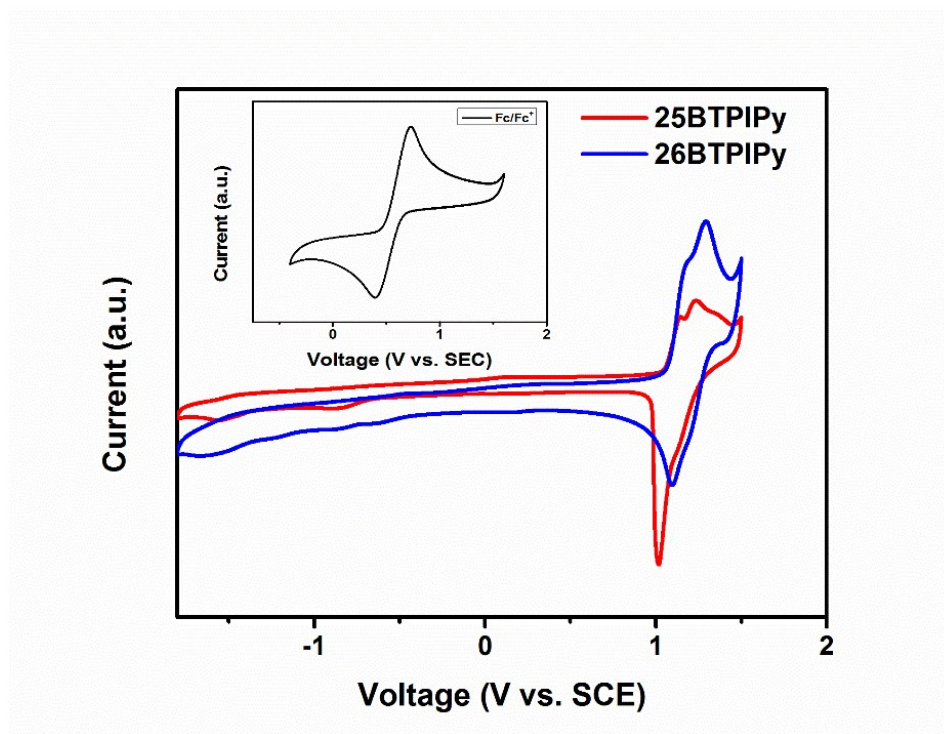

Fig. S1 Positive CV scans of **26BTPIPy** and **25BTPIPy** (inset: ferrocene) against saturated calomel electrode (SCE)

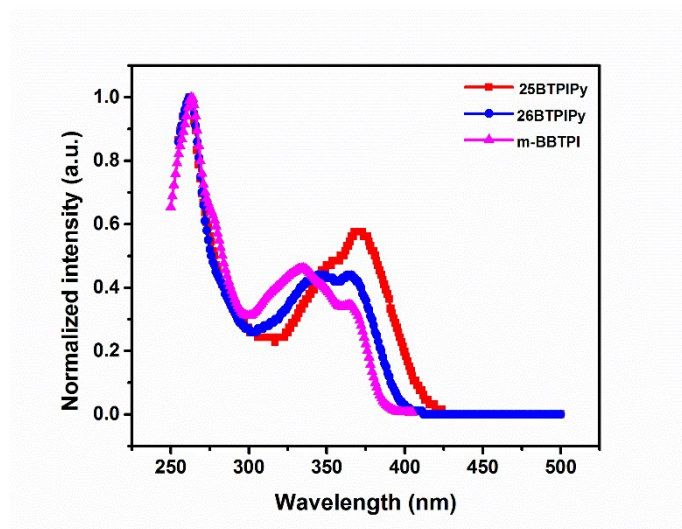

Fig. S2 Absorption spectra of *m*-BBTPI, **26BTPIPy** and **25BTPIPy** in DCM.

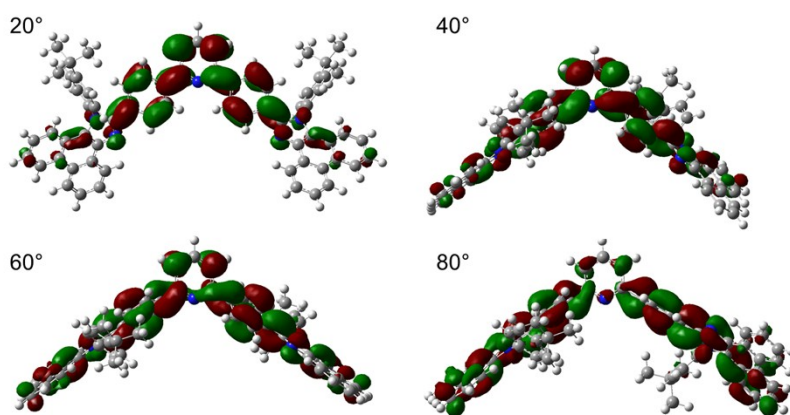

Fig. S3 Calculated LUMO distributions of **26BTPIPy** with arbitrary fixed twisting angle between the pyridine ring and two connected benzene rings.

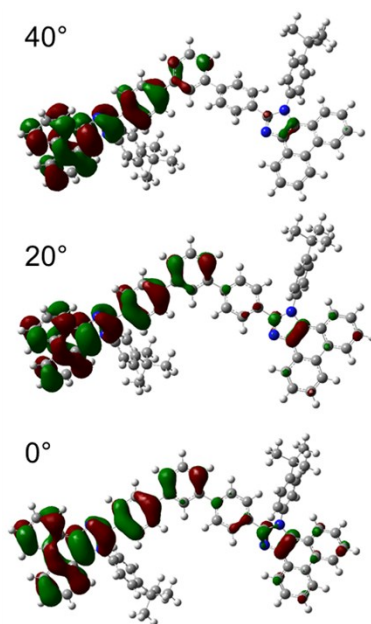

Fig. S4 Calculated HOMO distributions of *m*-BBTPI with arbitrary fixed twisting angle between the central benzene ring and two connected benzene rings.

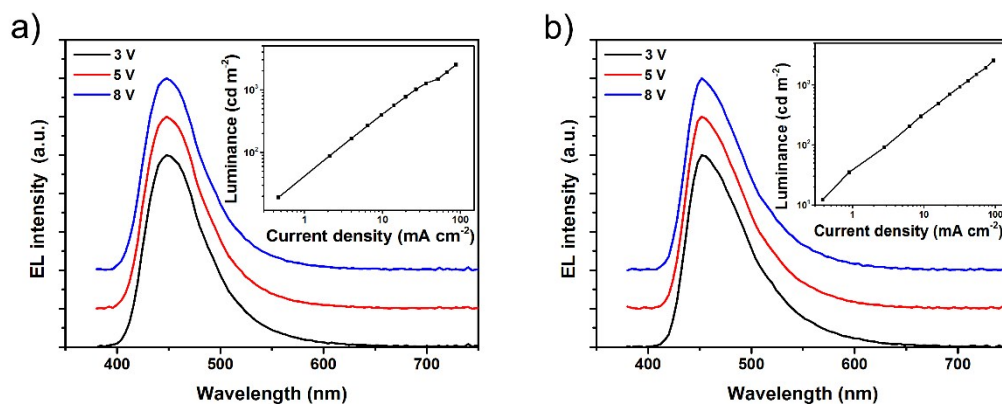

Fig. S5 EL spectra at different voltages (inset is luminescence-current density plot) of a) **26BTPIPy** and b) **25BTPIPy**-based bilayer devices

#### References:

1. a) N. Kuhnert, C. Patel and F. Jami, *Tetra. Lett.*, 2005, **46**, 7575-7579; b) A. Suzuki and H. C. Brown, *Organic Syntheses via Boranes: Suzuki Coupling*, Aldrich Chemical Company, 2003.
